# Supplementary material for: Characterization of reactive oxidized nitrogen in the global upper troposphere using recent and historic commercial and research aircraft campaigns and GEOS-Chem
Source: Copernicus journal article supplement (doi:10.5194/acp-25-7925-2025), 2025-07-01
Supplement: Supplementary file 1 [file acp-25-7925-2025-supplement.pdf]

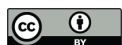

*Supplement of*

## **Characterization of reactive oxidized nitrogen in the global upper troposphere using recent and historic commercial and research aircraft campaigns and GEOS-Chem**

**Nana Wei et al.**

*Correspondence to:* Nana Wei ([nana.wei.21@ucl.ac.uk](mailto:nana.wei.21@ucl.ac.uk)) and Eloise A. Marais ([e.marais@ucl.ac.uk](mailto:e.marais@ucl.ac.uk))

The copyright of individual parts of the supplement might differ from the article licence.

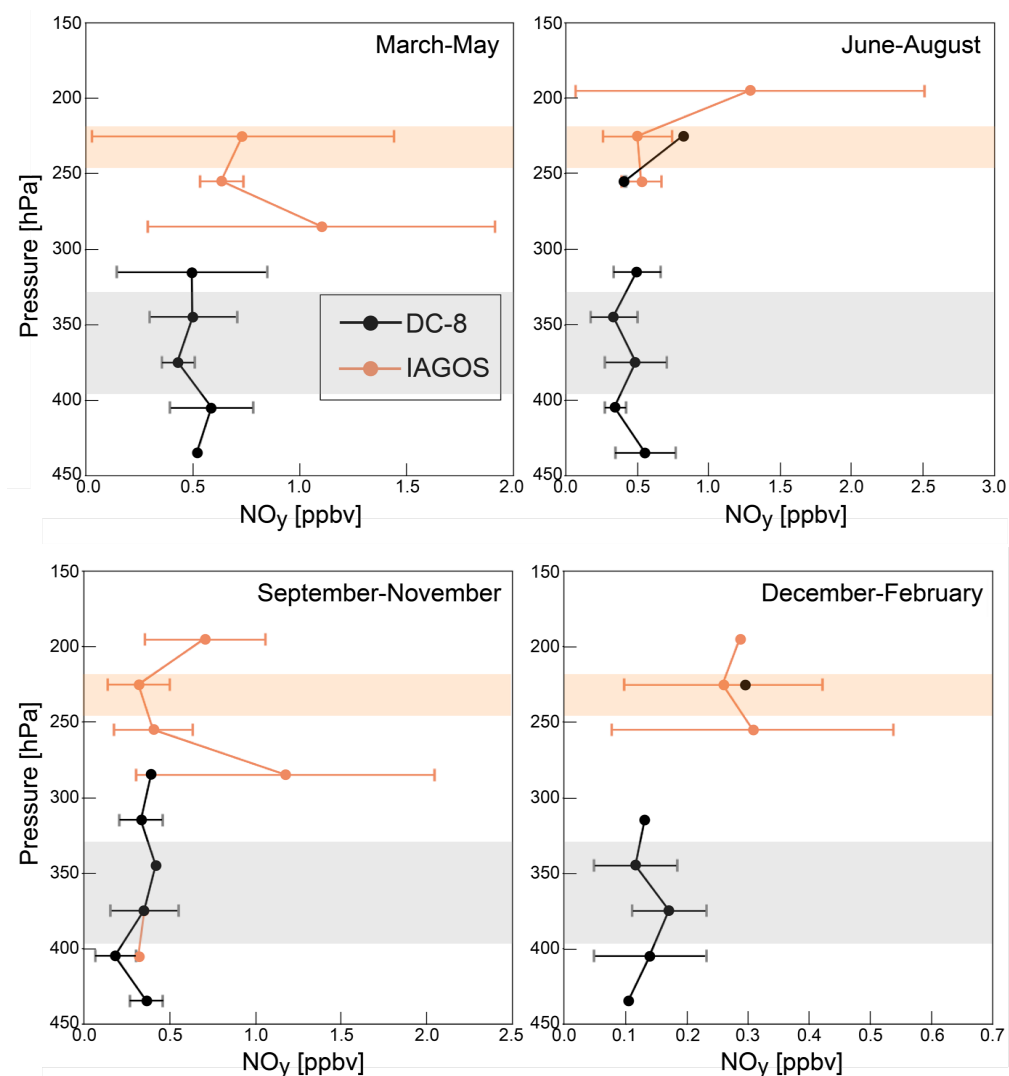

Figure S1: Comparison of seasonal mean vertical profiles of total reactive nitrogen ( $\text{NO}_y$ ) from collocated DC-8 and IAGOS aircraft observations. Symbols are means from averaging upper troposphere (450-180 hPa) observations into 30 hPa bins. Lines are standard deviations. Shading indicates the typical vertical sampling range (pressure standard deviation) of DC8 (grey) and IAGOS (orange). Pressure range selection and screening for stratospheric influence and plumes are detailed in the main manuscript.

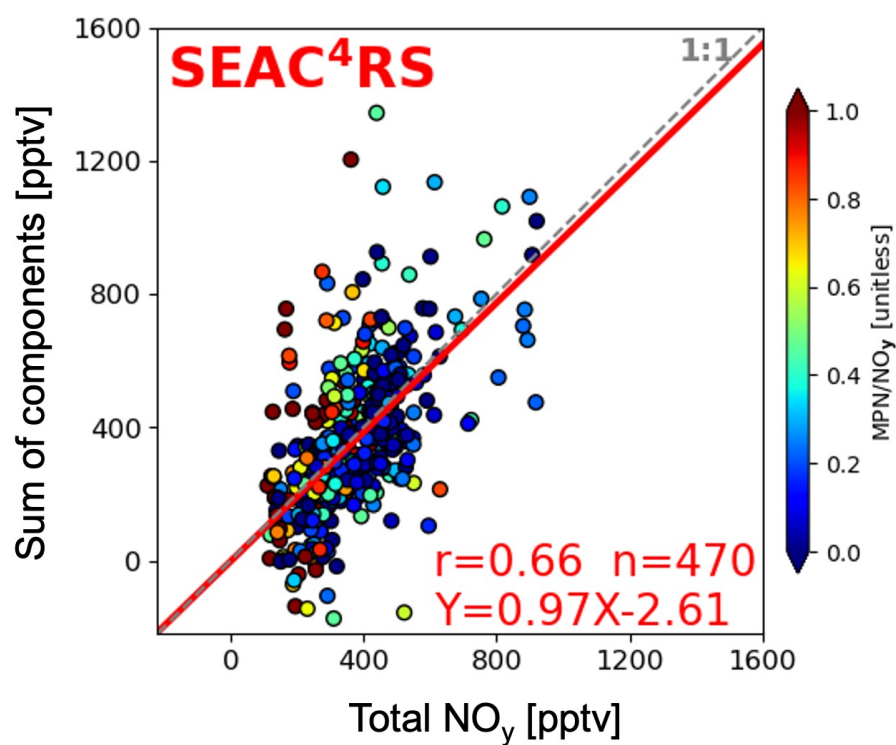

10

**Figure S2: Proportion of reactive oxidized nitrogen components measured during SEAC<sup>4</sup>RS. Figure format and inset values are as in Figure 4, but for SEAC<sup>4</sup>RS only and points are coloured by the relative proportion of methyl peroxy nitrate (MPN).**
